# Supplementary material
Source: PubMed Central journal article supplement (PMC7778346)

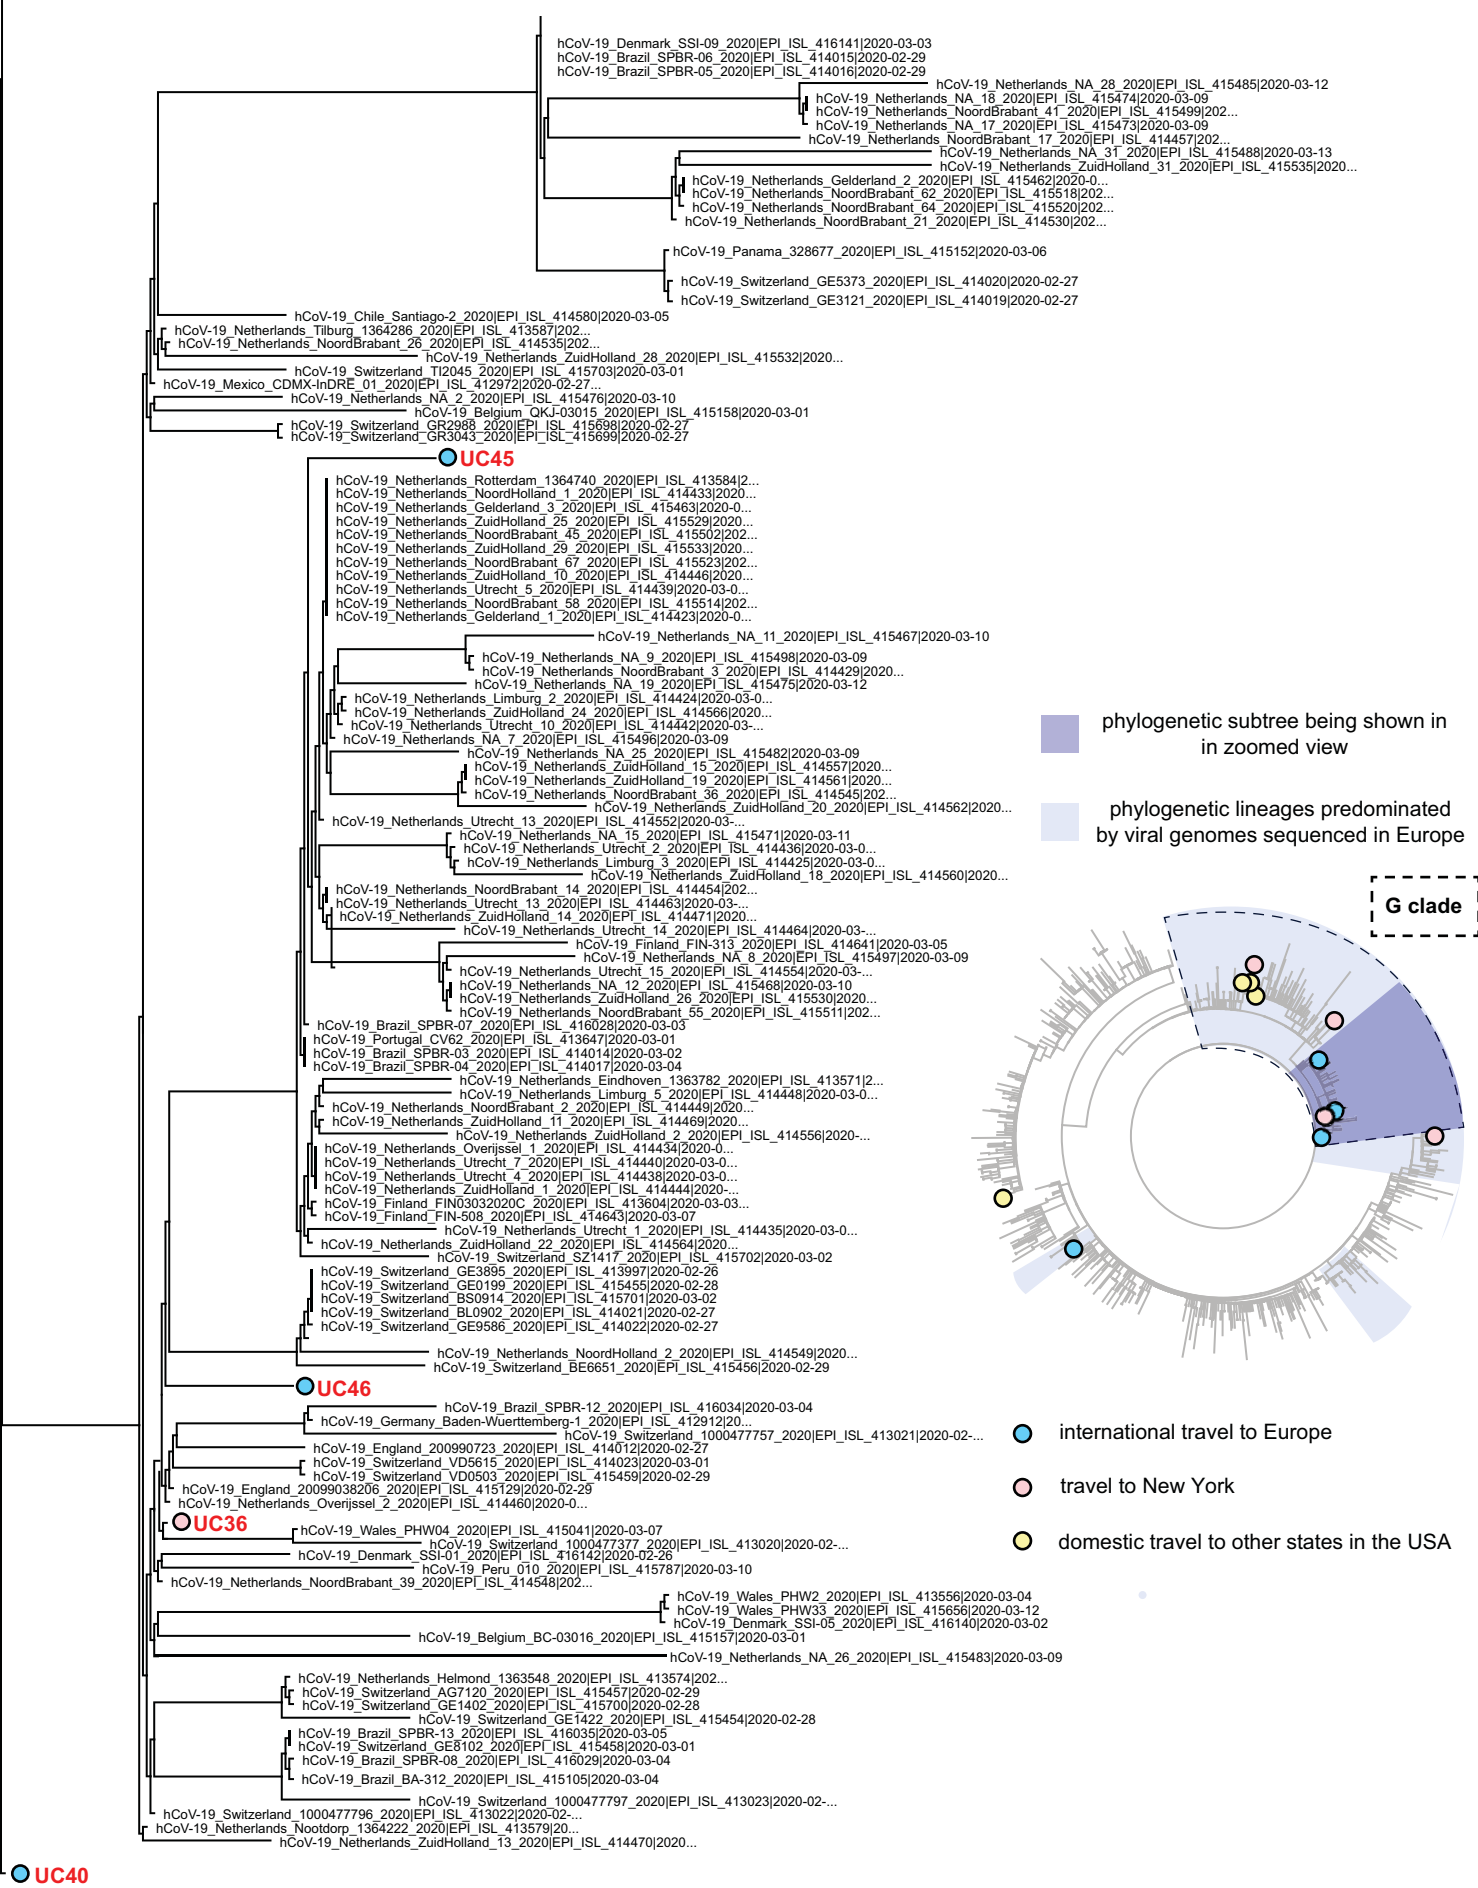

Supplement: ciaa599_suppl_supplementary_figure_1.pdf [file ciaa599_suppl_supplementary_figure_1.pdf]

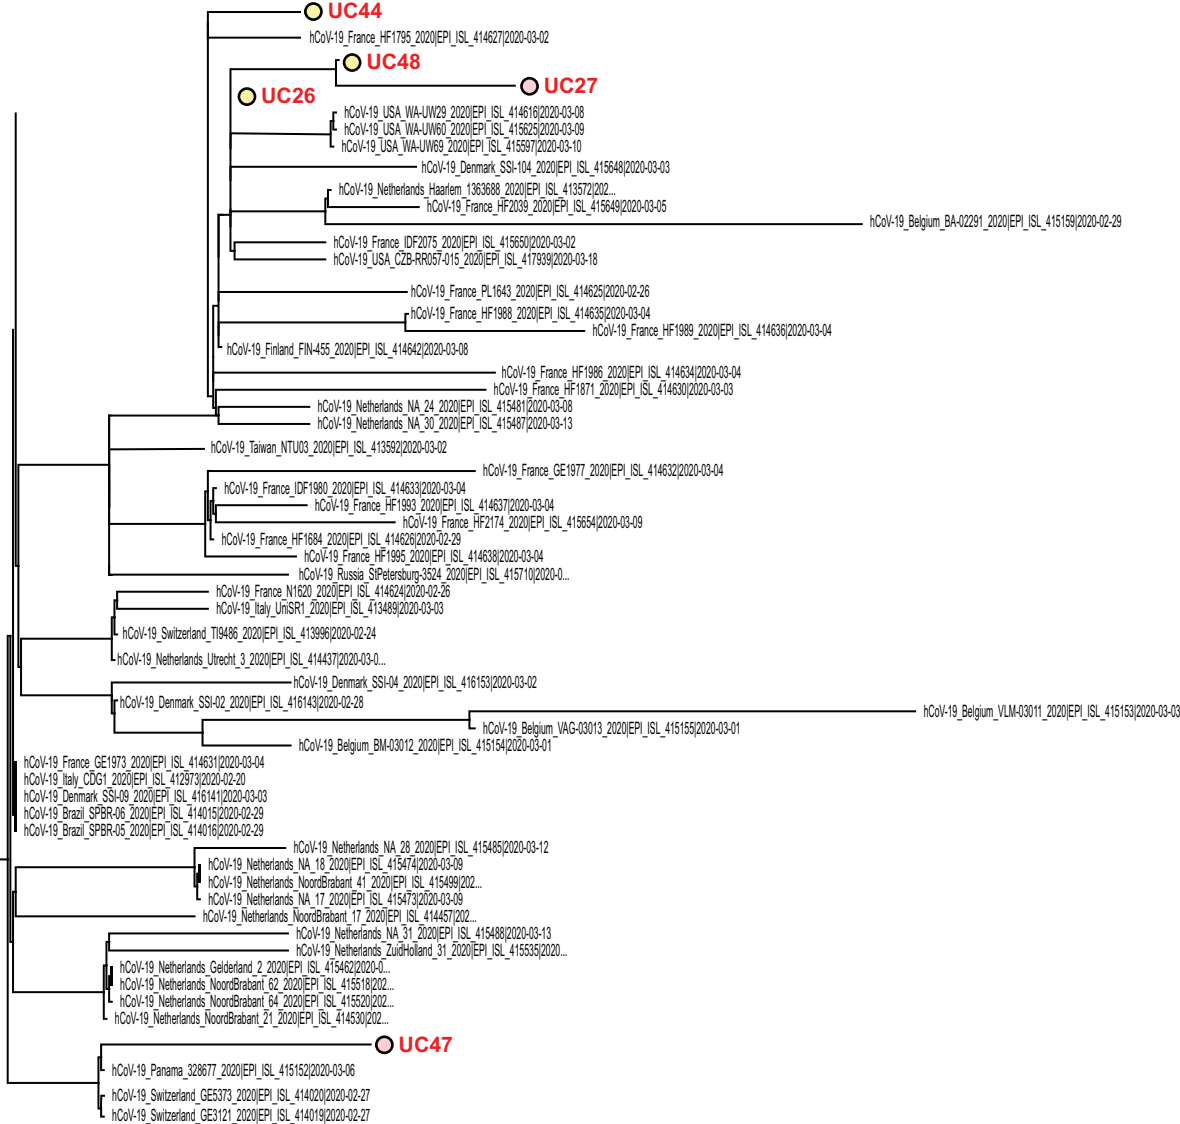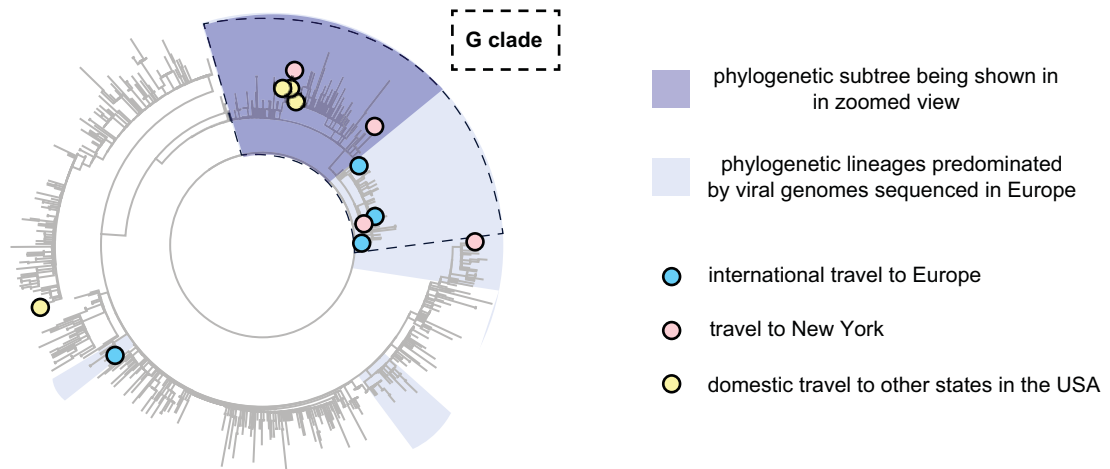

Supplement: ciaa599_suppl_supplementary_figure_2.pdf [file ciaa599_suppl_supplementary_figure_2.pdf]
